# Supplementary material
Source: Research Square preprint supplement (doi:10.21203/rs.3.rs-10020956/v1)
Supplement: Supplementary file 1 [file af0ae97681f575983d99ec55.docx]

Additional file 1. Primers used in this study.

| Primers Name | Target Production | Pathway | Sequence (5' to 3') | Source |
| --- | --- | --- | --- | --- |
| **Strain identification** |  |  |  |  |
| 16s rRNA-F | Small subunit ribosomal RNA | - | GGTTACCTTGTTACGACTT | This study |
| 16s rRNA-R | AGAGTTTGATCCTGGCTCAG | - |
| *gyrB*-F | DNA gyrase *β* subunit | - | CGCACTTCTGGGTCCATTGTCGTTT | This study |
| *gyrB*-R | GCGTGATCGTCACTTCCTCCAGAGA | - |
| *rpoB*-F | RNA polymerase *β* subunit | - | ACTGGTCGTGTTGAGCGATCA | This study |
| *rpoB*-R | AAGTAGAACTGTGGACGGTAG | - |
| *gfp*1-F | Green fluorescent protein | - | ATGTGGTCTCTCTTTTCGTTGGG | This study |
| *gfp*1-R | GCGTTCAACTAGCAGACCAT | - |
| *gfp*2-F | Green fluorescent protein |  | GACTTCAGCACGTGTCTTGTAG | This study |
| *gfp*2-R |  | TGGTGTTCAATGCTTTGCGAG | - |
| **Antimicrobial Secondary Metabolites** |  |  |  |  |
| *srf*-F | Surfactin | NRPS | GCGGACACTGATTTATTTGC | This study |
| *srf*-R | AATGGGCGGATTTTCTGTTC | - |
| *fenD*-F | Fengycin | NRPS | GCGGGTATCGTTGAAAAGCA | This study |
| *fenD*-R | CGGTTGTGCCACCATAAACG | - |
| *ituD*-F | Iturin | NRPS | GTCCCGTTGTTCTCTTCCG | This study |
| *ituD*-R | ACGTGCCAATTCGTAAATGG | - |
| *bamD-*F | Bacillomycin | NRPS | AGTCTAAGTATTGGCGAAACGA | This study |
| *bamD-*R | ATTATGCTGAAAGTGAAGGGCG |  |
| *mln-*F | Macrolactin | PKS | CGGTGATCATGACGGCTTTG | This study |
| *mln-*R | TCGGTCTGCTTTCTCAACCC | - |
| *bae-*F | Bacillaene | PKS | GTCTTACCTCGATTGCTGTG | This study |
| *bae-*R | CATACGTCACGATATCCACC | - |
| *dfn-*F | Difficidin | PKS | GTCTTACCTCGATTCGTGTG | This study |
| *dfn-*R | CATAGGTCACGATATCCACC | - |
| *locC*-F | Locillomycin | NRPS | TCATTGGTATGGGCAACTTC | This study |
| *locC*-R | CAGCATCTCTGTCCGTATGC | - |
| *aprE*-F | Subtilisin | Other | GTGGATCAGCTTGTTGTTTGC | This study |
| *aprE-*R | GGAACTCATGGCACTCATTGT | - |
| *dhbA-*F | Bacillibactin | NRPS | CAAGGAATAGGCGAAGCTGTTG | This study |
| *dhbA-*R | GCCCCATTTCACGTTCGATG | - |
| *bacA-*F | Bacilysin | Other | CTCCTGAACTTTGACCTTCGC | This study |
| *bacA-*R | CTTGTCAGCAAATGGGGCTT | - |
| **Analysis of ISR-related genes** |  |  |  |  |
| *AsHNR*-F | Heterogeneous nuclear ribonucleoprotein | - | TGCCAGAGTTCGTACTCAAGAGG | [50] |
| *AsHNR-*R | TTCTCGTATTGCGGATACGTGC |
| *AsPSKS1*-F | Protein PSK SIMULATOR 1-like | - | TGGAGAGTGGCTAGATCAGCTG | [51] |
| *AsPSKS1-*R | AAGCCAACACCTAATGTACAG |
| *AsSOD*-F | Superoxide dismutase | - | CACAAGCATAACAGCTGAACAGT | This study |
| *AsSOD-*R | TGCCACTATCAACAATTGTCGAC | - |
| *AsPOD*-F | Peroxidase | - | CCCAATTGACTCTCCGTCATG | This study |
| *AsPOD-*R | CCGTCCATGAGCACTGAAGC | - |
| *AsCAT*-F | Catalase | - | CAGGCTGACGATAGACTCC | This study |
| *AsCAT-*R | AGCTTCAGTAGATGCATACC | - |
| *AsAPX*-F | Ascorbate peroxidase | - | GCTCCGTGAAGTATGCGTACTCA | This study |
| *AsAPX-*R | CCTGGATTGGTACCATAACG | - |
| *AsGST*-F | Glutathione S-transferase | - | GGTGGTACCTGACATGTTCA | This study |
| *AsGST-*R | GGAGTGATTAAGGATCTGTAAC | - |
| *AsGPX*-F | Glutathione peroxidase | - | CTACGGTAAAGTATCGTCATCAC | This study |
| *AsGPX-*R | AGCTCGATTTACGCACAGTACG | - |
