# Supplementary material
Source: Research Square preprint supplement (doi:10.21203/rs.3.rs-10020956/v1)
Supplement: Supplementary file 2 [file c3d8c4504cdd9d071a613ee7.docx]

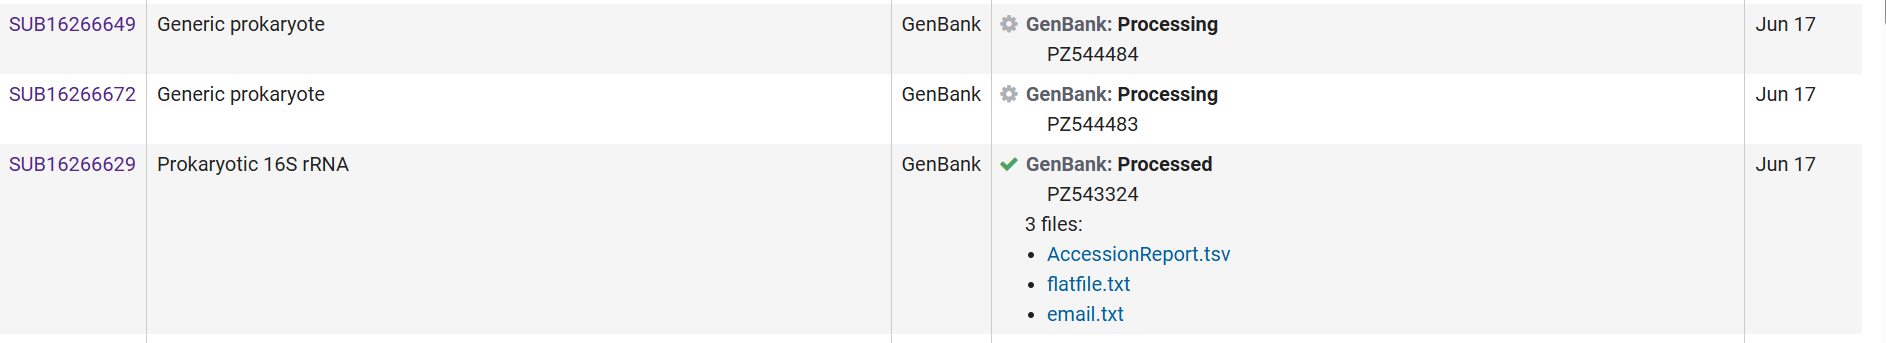


**Additional file 3. The submission records and accession details of the 16S rRNA and related sequences in NCBI GenBank.**
